# Supplementary material
Source: ML conference proceedings conference paper supplement (https://openaccess.thecvf.com/content/WACV2024/html/Duan_Evidential_Uncertainty_Quantification_WACV_2024_paper.html)
Supplement: Supplementary file 1 [file Duan_Evidential_Uncertainty_Quantification_WACV_2024_supplemental.pdf]

# Evidential Uncertainty Quantification: A Variance-Based Perspective

## Supplementary Material

Ruxiao Duan<sup>1</sup>, Brian Caffo<sup>1</sup>, Harrison X. Bai<sup>2</sup>, Haris I. Sair<sup>2</sup>, Craig Jones<sup>1</sup>

<sup>1</sup>Johns Hopkins University

<sup>2</sup>Johns Hopkins University School of Medicine

{rduan6, bcaffo1, hbai7, craigj}@jhu.edu, hsair1@jhmi.edu

### A. Derivations

#### A.1. Problem Setup

In a  $C$ -class classification problem, it is assumed that the label vector  $\mathbf{y} = [y_1, y_2, \dots, y_C]^\top$  is a one-hot random vector that follows a categorical distribution with parameters  $\boldsymbol{\mu}$ . The class probabilities  $\boldsymbol{\mu}$  follow a Dirichlet distribution with concentration parameters  $\boldsymbol{\alpha}$ .

$$\mathbf{y} \sim \text{Cat}(\boldsymbol{\mu}) \quad \boldsymbol{\mu} \sim \text{Dir}(\boldsymbol{\alpha}) \quad (1)$$

in which  $\text{Cat}(\cdot)$  and  $\text{Dir}(\cdot)$  denote categorical distribution and Dirichlet distribution respectively.

The class probability vector is  $\boldsymbol{\mu} = [\mu_1, \mu_2, \dots, \mu_C]^\top$ , in which  $\mu_c \in [0, 1]$  and  $\sum_{c=1}^C \mu_c = 1$ . The Dirichlet parameters are specified by  $\boldsymbol{\alpha} = [\alpha_1, \alpha_2, \dots, \alpha_C]^\top$  in which  $\alpha_c > 0$  for  $c \in \{1, 2, \dots, C\}$ . The Dirichlet strength is denoted by  $\alpha_0 = \sum_{c=1}^C \alpha_c$ .

The expected class probabilities are  $\bar{\boldsymbol{\mu}} = \mathbb{E}[\boldsymbol{\mu}] = \frac{\boldsymbol{\alpha}}{\alpha_0}$ . For class  $c$ , the expected probability is  $\bar{\mu}_c = \mathbb{E}[\mu_c] = \frac{\alpha_c}{\alpha_0}$ .

#### A.2. Covariance Matrices

The covariance matrix of  $\mathbf{y}$  is defined as

$$\text{Cov}[\mathbf{y}] := \mathbb{E}[(\mathbf{y} - \mathbb{E}[\mathbf{y}])(\mathbf{y} - \mathbb{E}[\mathbf{y}])^\top] \quad (2)$$

which can be decomposed into aleatoric and epistemic components based on the law of total covariance.

$$\underbrace{\text{Cov}[\mathbf{y}]}_{\text{total}} = \underbrace{\mathbb{E}[\text{Cov}[\mathbf{y}|\boldsymbol{\mu}]]}_{\text{aleatoric}} + \underbrace{\text{Cov}[\mathbb{E}[\mathbf{y}|\boldsymbol{\mu}]]}_{\text{epistemic}} \quad (3)$$

##### A.2.1 Aleatoric Covariance

The aleatoric covariance matrix can be calculated as

$$\text{Cov}[\mathbf{y}]^{\text{alea}} = \mathbb{E}[\text{Cov}[\mathbf{y}|\boldsymbol{\mu}]] = \mathbb{E}[\text{Diag}(\boldsymbol{\mu}) - \boldsymbol{\mu}\boldsymbol{\mu}^\top] \quad (4)$$

in which  $\text{Diag}(\cdot)$  represents a diagonal matrix with the specified vector in its diagonal.

For  $i \in \{1, 2, \dots, C\}$ ,

$$\text{Cov}[\mathbf{y}]_{i,i}^{\text{alea}} = \mathbb{E}[\mu_i - \mu_i^2] \quad (5)$$

$$= \mathbb{E}[\mu_i] - \mathbb{E}[\mu_i^2] \quad (6)$$

$$= \mathbb{E}[\mu_i] - \mathbb{E}^2[\mu_i] - \text{Var}[\mu_i] \quad (7)$$

$$= \bar{\mu}_i - \bar{\mu}_i^2 - \frac{\bar{\mu}_i - \bar{\mu}_i^2}{\alpha_0 + 1} \quad (8)$$

$$= \frac{\alpha_0}{\alpha_0 + 1} (\bar{\mu}_i - \bar{\mu}_i^2) \quad (9)$$

For  $i, j \in \{1, 2, \dots, C\}$  such that  $i \neq j$ ,

$$\text{Cov}[\mathbf{y}]_{i,j}^{\text{alea}} = \mathbb{E}[-\mu_i\mu_j] \quad (10)$$

$$= -\mathbb{E}[\mu_i\mu_j] \quad (11)$$

$$= -\text{Cov}[\mu_i, \mu_j] - \mathbb{E}[\mu_i]\mathbb{E}[\mu_j] \quad (12)$$

$$= -\frac{-\bar{\mu}_i\bar{\mu}_j}{\alpha_0 + 1} - \bar{\mu}_i\bar{\mu}_j \quad (13)$$

$$= -\frac{\alpha_0}{\alpha_0 + 1} \bar{\mu}_i\bar{\mu}_j \quad (14)$$

Therefore, the aleatoric covariance matrix can be expressed as

$$\text{Cov}[\mathbf{y}]^{\text{alea}} = \frac{\alpha_0}{\alpha_0 + 1} (\text{Diag}(\bar{\boldsymbol{\mu}}) - \bar{\boldsymbol{\mu}}\bar{\boldsymbol{\mu}}^\top) \quad (15)$$

##### A.2.2 Epistemic Covariance

The epistemic covariance matrix can be derived as

$$\text{Cov}[\mathbf{y}]^{\text{epis}} = \text{Cov}[\mathbb{E}[\mathbf{y}|\boldsymbol{\mu}]] = \text{Cov}[\boldsymbol{\mu}] \quad (16)$$

For  $i \in \{1, 2, \dots, C\}$ ,

$$\text{Cov}[\mathbf{y}]_{i,i}^{\text{epis}} = \text{Var}[\mu_i] = \frac{\bar{\mu}_i - \bar{\mu}_i^2}{\alpha_0 + 1} \quad (17)$$

For  $i, j \in \{1, 2, \dots, C\}$  such that  $i \neq j$ ,

$$\text{Cov}[\mathbf{y}]_{i,j}^{\text{epis}} = \text{Cov}[\mu_i, \mu_j] = \frac{-\bar{\mu}_i\bar{\mu}_j}{\alpha_0 + 1} \quad (18)$$

Therefore, the epistemic covariance matrix can be expressed as

$$\text{Cov}[\mathbf{y}]^{epis} = \frac{1}{\alpha_0 + 1} (\text{Diag}(\bar{\boldsymbol{\mu}}) - \bar{\boldsymbol{\mu}}\bar{\boldsymbol{\mu}}^\top) \quad (19)$$

### A.2.3 Total Covariance

The total covariance matrix can be derived as the sum of aleatoric and epistemic components.

$$\text{Cov}[\mathbf{y}] = \text{Cov}[\mathbf{y}]^{alea} + \text{Cov}[\mathbf{y}]^{epis} \quad (20)$$

$$= \text{Diag}(\bar{\boldsymbol{\mu}}) - \bar{\boldsymbol{\mu}}\bar{\boldsymbol{\mu}}^\top \quad (21)$$

### A.3. Evidential Class Uncertainties

The evidential uncertainties of class  $c \in \{1, 2, \dots, C\}$  not only can be directly retrieved from the diagonal of the corresponding covariance matrix but also can be calculated by decomposing the variance of the class random variable  $y_c$  based on the law of total variance. The two approaches yield the same result.

$$\underbrace{\text{Var}[y_c]}_{\text{total}} = \underbrace{\mathbb{E}[\text{Var}[y_c|\boldsymbol{\mu}]]}_{\text{aleatoric}} + \underbrace{\text{Var}[\mathbb{E}[y_c|\boldsymbol{\mu}]]}_{\text{epistemic}} \quad (22)$$

The aleatoric, epistemic, and total class uncertainties can respectively be quantified as follows

$$U_c^{alea} = \mathbb{E}[\text{Var}[y_c|\boldsymbol{\mu}]] \quad (23)$$

$$= \mathbb{E}[\mu_c(1 - \mu_c)] \quad (24)$$

$$= \mathbb{E}[\mu_c] - \mathbb{E}[\mu_c^2] \quad (25)$$

$$= \mathbb{E}[\mu_c] - \mathbb{E}^2[\mu_c] - \text{Var}[\mu_c] \quad (26)$$

$$= \bar{\mu}_c - \bar{\mu}_c^2 - \frac{\bar{\mu}_c - \bar{\mu}_c^2}{\alpha_0 + 1} \quad (27)$$

$$= \frac{\alpha_0}{\alpha_0 + 1} (\bar{\mu}_c - \bar{\mu}_c^2) \quad (28)$$

$$U_c^{epis} = \text{Var}[\mathbb{E}[y_c|\boldsymbol{\mu}]] \quad (29)$$

$$= \text{Var}[\mu_c] \quad (30)$$

$$= \frac{1}{\alpha_0 + 1} (\bar{\mu}_c - \bar{\mu}_c^2) \quad (31)$$

$$U_c = U_c^{alea} + U_c^{epis} \quad (32)$$

$$= \bar{\mu}_c - \bar{\mu}_c^2 \quad (33)$$

The derivation is the same as the covariance derivation on the diagonal entries.
